# Supplementary material
Source: PubMed Central journal article supplement (PMC8753442)
Supplement: jitc-2020-001550supp001.pdf [file jitc-2020-001550supp001.pdf]

**Questions regarding your cancer immunotherapy:**

1. What was the date of your most recent infusion of cancer immunotherapy?
2. Has your immunotherapy been held/stopped? (Y/N)
  - a. What was the reason it was stopped/held?
    - i. Immunotherapy was not working (cancer progression)
    - ii. Concerns about the coronavirus pandemic
    - iii. Side effects from immunotherapy
      1. Which side effects \_\_\_\_\_
    - iv. Other reason
      1. Other reason \_\_\_\_\_
3. What was the date of your most recent cancer scan(s)
4. What was the result of your cancer scan? (Complete response, partial response, stable, progression, not sure, other \_\_\_\_\_)
5. Since your last visit, have you been started on other medications for your cancer? (Y/N) - [if yes, then]
  - a. free text name of medication
  - b. Date started

**Questions regarding any new side effects from immunotherapy**

1. Have you had any new side effects from your immunotherapy since your last visit/survey? (Y/N).  
[If yes, then:]
  - i. Which problem or part of the body listed below was affected by this side effect?
  - ii. For any below marked yes, ask
    1. Were you hospitalized?
    2. May we call you to get more information about this?
  - b. Heart
  - c. Skin rash
  - d. Thyroid
  - e. Diabetes
  - f. Eye problem
  - g. Diarrhea/colitis
  - h. Liver test abnormalities
  - i. Blood count abnormalities
  - j. Neurological problem
  - k. Lung problem
  - l. Kidney problem
  - m. Other problem (specify \_\_\_\_\_)

**The next part of the survey is for patient who have had arthritis/joint pain from their immunotherapy:**

2. Do you currently or have you had joint pain as a side effect of immunotherapy (Y/N) – [next sections populate only if yes, If the answer is no then skip to \*\*7 below]
  - a. Rate the following as: Without any difficulty, with some difficulty, with much difficulty, unable to do:

- i. Dress yourself, including tying shoelaces and doing buttons?
    - ii. Get in and out of bed?
    - iii. Lift a full cup or glass to your mouth
    - iv. Walk outdoors on flat ground?
    - v. Wash and dry your entire body?
    - vi. Bend down to pick up clothing from the floor?
    - vii. Turn regular faucets on and off?
    - viii. Get in and out of a car, bus, train or airplane?
    - ix. Walk two miles or three kilometers, if you wish?
    - x. Participate in recreational activities, if you wish?
  - b. How much pain have you felt due to your arthritis during the last week?  
(0, no pain - 10, extreme pain)
  - c. Considering all the ways in which illness and health conditions may affect you at this time, please indicate how you are doing  
(0, very well – 10, very poorly)
3. In terms of your arthritis, which would you consider it to be: [choose one only]
  - a. Ongoing, and not controlled by my arthritis treatment
  - b. Ongoing at a stable/tolerable level on arthritis treatment
  - c. Continuing to improve with arthritis treatment
  - d. Resolved, and I'm still on arthritis treatment
  - e. Resolved and I'm no longer on arthritis treatment
  - f. Resolved and I'm no longer on arthritis treatment, but I have lasting damage to my joints
4. Are you having a flare of your arthritis at this time Y/N [if yes, then]
  - a. How long has this flare of your arthritis been going on?
    - i. 1-3 days
    - ii. 4-7 days
    - iii. 8-14 days
    - iv. More than 14 days
  - b. Please choose a number to indicate the severity of your flare during the last week
    - i. 0 (no flare) – 10 (extreme flare)
5. Do you have any tender (painful) joints today? Y/N
  - a. Which joints are tender?

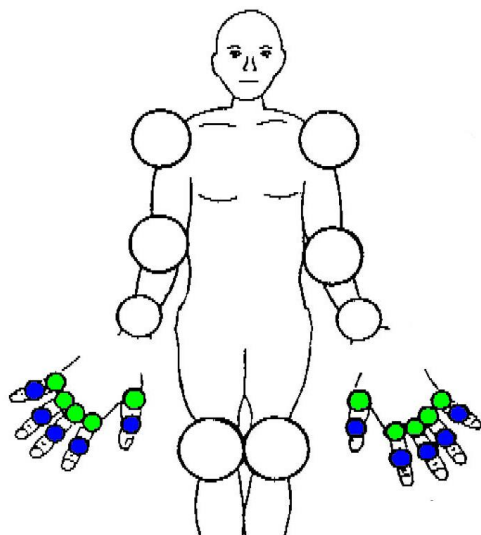

- i. Right shoulder
- ii. Left shoulder
- iii. Right elbow
- iv. Left elbow
- v. Right wrist
- vi. Left wrist
- vii. Right thumb blue joint
- viii. Right thumb green joint
- ix. Right pointer finger blue joint
- x. Right pointer finger green joint
- xi. Right middle finger blue joint
- xii. Right middle finger green joint
- xiii. Right ring finger blue joint
- xiv. Right ring finger green joint
- xv. Right pinky blue joint
- xvi. Right pinky green joint
- xvii. Left thumb blue joint
- xviii. Left thumb green joint
- xix. Left pointer finger blue joint
- xx. Left pointer finger green joint
- xxi. Left middle finger blue joint
- xxii. Left middle finger green joint
- xxiii. Left ring finger blue joint
- xxiv. Left ring finger green joint
- xxv. Left pinky blue joint
- xxvi. Left pinky green joint
- xxvii. Right knee
- xxviii. Left knee

6. Do you have any swollen joints today? Y/N

a. Which swollen joints?

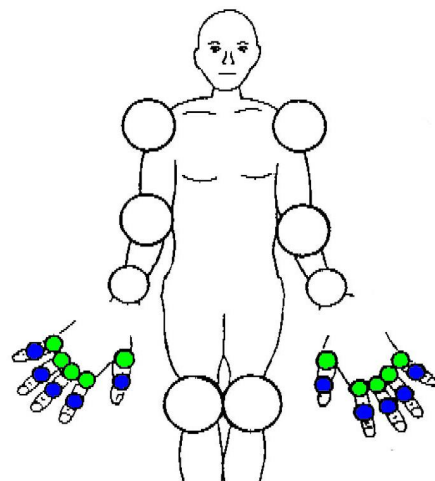

- i. Right shoulder
- ii. Left shoulder
- iii. Right elbow
- iv. Left elbow
- v. Right wrist
- vi. Left wrist
- vii. Right thumb blue joint
- viii. Right thumb green joint
- ix. Right pointer finger blue joint
- x. Right pointer finger green joint
- xi. Right middle finger blue joint
- xii. Right middle finger green joint
- xiii. Right ring finger blue joint
- xiv. Right ring finger green joint
- xv. Right pinky blue joint
- xvi. Right pinky green joint
- xvii. Left thumb blue joint
- xviii. Left thumb green joint
- xix. Left pointer finger blue joint
- xx. Left pointer finger green joint
- xxi. Left middle finger blue joint
- xxii. Left middle finger green joint
- xxiii. Left ring finger blue joint
- xxiv. Left ring finger green joint
- xxv. Left pinky blue joint
- xxvi. Left pinky green joint

- xxvii. Right knee
- xxviii. Left knee

**\*\*Non-arthritis side effects of immunotherapy**

7. Which non-arthritis side effect of immunotherapy did you see/saw the rheumatologist for?
- a. No non-arthritis side effects
  - b. Dry eyes/dry mouth
  - c. Muscle aches/weakness
  - d. Eosinophilic fasciitis
  - e. Gout/pseudogout
  - f. Carpal tunnel syndrome
  - g. Abnormal blood tests
  - h. No rheumatic symptoms; visit was pre-emptive
  - i. Other

[(If yes) for any of the above, Is it currently:]

- i. Ongoing, and not controlled by treatment prescribed by my rheumatologist
- ii. Ongoing at a stable/tolerable level on treatment prescribed by my rheumatologist
- iii. Continuing to improve with treatment prescribed by my rheumatologist
- iv. Resolved, and I'm still on treatment prescribed by my rheumatologist
- v. Resolved, and I'm no longer on treatment prescribed by my rheumatologist
- vi. Resolved, and I'm no longer on treatment prescribed by my rheumatologist, but I have lasting damage

8. Which of the following medications are you currently being prescribed for your autoimmune side effects of immunotherapy? [if checked, ask for the date of the last dose]
- a. None
  - b. NSAIDS:
    - i. Naproxyn/Aleve, ibuprofen/Advil/Motrin, meloxicam/Mobic, diclofenac/Voltaren, other NSAID \_\_\_\_
  - c. Prednisone
    - i. Current dose
  - d. Methylprednisolone
    - i. Current dose
  - e. Hydroxychloroquine/Plaquenil
    - i. Dose (#tablets daily)
  - f. Sulfasalazine/Azulfidine
  - g. Methotrexate
  - h. Leflunomide/Arava
  - i. Budesonide
  - j. Mycophenolate mofetil/Cellcept
  - k. Infliximab/Remicade
  - l. Adalimumab/Humira

- m. Tocilizumab/Actemra
- n. Sarilumab/Kevzara
- o. Rituximab
- p. Abatacept/Orencia
- q. Other \_\_\_\_\_

9. Have you stopped or changed the dose of any of the medications prescribed by your rheumatologist since your last visit/survey? (Y/N)

[If yes, for any marked above, choose one of these three options]

- a. Stopped (date)
- b. Reduced dose (date)
- c. Reduced frequency (date)

[and ask:]

- d. Reason for change?
  - i. MD instructed me to due to coronavirus
    - 1. Rheumatologist
    - 2. oncologist
  - ii. MD instructed me to for other reasons
    - 1. Rheumatologist
    - 2. Oncologist
      - a. Reason for MD changing:
        - i. Side effects
        - ii. Improving
        - iii. Worsening
        - iv. Other
  - iii. I decided to on my own (If yes, then ask why)
    - 1. Medicine wasn't working
    - 2. Medicine was causing side effect
    - 3. Coronavirus
      - a. I was worried about getting coronavirus
      - b. I had symptoms of coronavirus, but was not diagnosed with it
      - c. I was diagnosed with coronavirus
    - 4. Other reason

**Now we are going to ask some questions about coronavirus:**

10. Have you had close contact with someone with a diagnosis of coronavirus?  
(Y/N/other/unknown/details)
11. Have you been tested for coronavirus with either a nasal swab or blood test? (Y/N) if yes
- a. date or approximate date
  - b. result – positive, negative, unknown

(If no)

- c. Have you been diagnosed with coronavirus by a doctor without a test? Y/N
12. Were you hospitalized for coronavirus? Y/N
13. Is there anything else you would like to tell us about how you are doing? (free text)
14. Is there anything else you would like to tell us about how coronavirus has affected you personally? (Free text)
